# Supplementary material for: Quantitative Comparison of Prone and Supine PERCIST Measurements in Breast Cancer
Source: PubMed Central journal article supplement — Tomography. 2020 Jun;6(2):170–6. doi: 10.18383/j.tom.2020.00002 (PMC7289244; doi:10.18383/j.tom.2020.00002), 2020-06

## Supplemental Data

### Quantitative Comparison of Prone and Supine PERCIST Measurements in Breast Cancer

Jennifer G. Whisenant<sup>1,2</sup>, Jason M. Williams<sup>3</sup>, Hakmook Kang<sup>3,4</sup>, Lori R. Arlinghaus<sup>3</sup>, Richard G. Abramson<sup>1,3,5</sup>, Vandana G. Abramson<sup>1,2</sup>, Kareem Fakhoury<sup>6</sup>, A. Bapsi Chakravarthy<sup>1,6</sup>, Thomas E. Yankeelov<sup>7</sup>

#### Affiliations

<sup>1</sup>Vanderbilt-Ingram Cancer Center, Vanderbilt University Medical Center, Nashville, Tennessee, USA

<sup>2</sup>Department of Medicine, Vanderbilt University Medical Center, Nashville, Tennessee, USA

<sup>3</sup>Vanderbilt University Institute of Imaging Science, Vanderbilt University Medical Center, Nashville, Tennessee, USA

<sup>4</sup>Department of Biostatistics, Vanderbilt University Medical Center, Nashville, Tennessee, USA

<sup>5</sup>Department of Radiology and Radiological Sciences, Vanderbilt University Medical Center, Nashville, Tennessee, USA

<sup>6</sup>University of Colorado, Department of Radiation Oncology, University of Colorado Cancer Center, Anschutz Medical Campus, Aurora, CO, USA

<sup>7</sup>Oden Institute for Computational Engineering and Sciences, Livestrong Cancer Institutes, Departments of Biomedical Engineering, Diagnostic Medicine, and Oncology, The University of Texas, Austin, Texas, USA

#### Contents

Supplemental Table 1

Supplemental Table 2

Supplemental Figure 1

Supplemental Figure 2

Supplemental Figure 3

**Supplemental Table 1: Individual patient and tumor characteristics at baseline, as well as chemotherapy regimens received and pathological response.**

| Study ID | Clinical stage | Size (cm) | Receptor Status          | NAC Agent #1               | NAC Agent #2               | NAC Agent #3                 | NAC Agent #4               | PATH RESPONSE |
|----------|----------------|-----------|--------------------------|----------------------------|----------------------------|------------------------------|----------------------------|---------------|
| 1        | IIIC           | 5.4       | Triple Negative          | Paclitaxel (Taxol)         | Cisplatin (Platinol)       | Everolimus (RAD-001/Placebo) |                            | NR            |
| 2        | IIB            | 7.1       | Triple Negative          | Paclitaxel (Taxol)         | Doxorubicin (Adriamycin)   | Cyclophosphamide (Cytoxan)   |                            | pCR           |
| 3        | IIIA           | 6.4       | Triple Negative          | Cyclophosphamide (Cytoxan) | Doxorubicin (Adriamycin)   | Paclitaxel (Taxol)           |                            | NR            |
| 4        | IIIB           | 4.9       | ER (+), PR (+), HER2 (+) | Docetaxel (Taxotere)       | Trastuzumab (Herceptin)    | Carboplatin (Paraplatin)     |                            | NR            |
| 5        | IIIA           | 10        | ER (+), PR (+)           | Doxorubicin (Adriamycin)   | Cyclophosphamide (Cytoxan) | Paclitaxel (Taxol)           |                            | NR            |
| 6        | IV             | 9         | ER (+), PR (+)           | Letrozole (Femara)         | Other                      | Other                        | Paclitaxel (Taxol)         | No Surgery    |
| 7        | IIIA           | 4.8       | ER (+), PR (+), HER2 (+) | Docetaxel (Taxotere)       | Carboplatin (Paraplatin)   | Trastuzumab (Herceptin)      |                            | NR            |
| 8        | IIIA           | 6.4       | Triple Negative          | Paclitaxel (Taxol)         | Cisplatin (Platinol)       | Everolimus (RAD-001/Placebo) |                            | No Surgery    |
| 9        | IIB            | 4.5       | HER2 (+)*                | Docetaxel (Taxotere)       | Carboplatin (Paraplatin)   | Trastuzumab (Herceptin)      |                            | NR            |
| 10       | IIIA           | 3.1       | HER2 (+)*                | Paclitaxel (Taxol)         | Trastuzumab (Herceptin)    | Doxorubicin (Adriamycin)     | Cyclophosphamide (Cytoxan) | NR            |
| 11       | IIIC           | 5         | Triple Negative          | Doxorubicin (Adriamycin)   | Cyclophosphamide (Cytoxan) | Paclitaxel (Taxol)           |                            | pCR           |
| 12       | IIA            | 1.9       | Triple Negative          | Doxorubicin (Adriamycin)   | Paclitaxel (Taxol)         | Cyclophosphamide (Cytoxan)   |                            | pCR           |
| 13       | IIIA           | 4.3       | ER (+), PR (+)           | Doxorubicin (Adriamycin)   | Cyclophosphamide (Cytoxan) | Paclitaxel (Taxol)           |                            | NR            |
| 14       | IIIA           | 5.9       | Triple Negative          | Doxorubicin (Adriamycin)   | Cyclophosphamide (Cytoxan) | Paclitaxel (Taxol)           |                            | No Surgery    |
| 15       | IIB            | 2.4       | Triple Negative          | Cisplatin (Platinol)       | Paclitaxel (Taxol)         | Everolimus (RAD-001/Placebo) |                            | NR            |
| 16       | I              | 1.9       | Triple Negative          | Cisplatin (Platinol)       | Paclitaxel (Taxol)         | Everolimus (RAD-001/Placebo) |                            | pCR           |
| 17       | IIIA           | 10        | HER2 (+)*                | Docetaxel (Taxotere)       | Carboplatin (Paraplatin)   | Trastuzumab (Herceptin)      |                            | pCR           |
| 18       | IIIA           | 9         | Triple Negative          | Cisplatin (Platinol)       | Paclitaxel (Taxol)         | Everolimus (RAD-001/Placebo) |                            | NR            |
| 19       | IIB            | 2.8       | PR (+)                   | Doxorubicin (Adriamycin)   | Cyclophosphamide (Cytoxan) | Paclitaxel (Taxol)           |                            | pCR           |
| 20       | IIB            | 2         | Triple Negative          | Cisplatin (Platinol)       | Paclitaxel (Taxol)         | Everolimus (RAD-001/Placebo) |                            | pCR           |
| 21       | IIB            | 3.9       | ER (+), PR (+)           | Doxorubicin (Adriamycin)   | Cyclophosphamide (Cytoxan) | Paclitaxel (Taxol)           |                            | NR            |
| 22       | IIIA           | 5         | ER (+), PR (+)           | Doxorubicin (Adriamycin)   | Cyclophosphamide (Cytoxan) | Paclitaxel (Taxol)           |                            | NR            |
| 23       | IIIB           | 4.6       | ER (+), HER2+            | Paclitaxel (Taxol)         | Trastuzumab (Herceptin)    |                              |                            | pCR           |

**Supplemental Table 1: Individual patient and tumor characteristics at baseline, as well as chemotherapy regimens received and pathological response.**

| Study ID | Clinical stage | Size (cm) | Receptor Status          | NAC Agent #1               | NAC Agent #2               | NAC Agent #3               | NAC Agent #4               | PATH RESPONSE |
|----------|----------------|-----------|--------------------------|----------------------------|----------------------------|----------------------------|----------------------------|---------------|
| 24       | IIIA           | 6.3       | ER (+), PR (+)           | Doxorubicin (Adriamycin)   | Cyclophosphamide (Cytoxan) | Paclitaxel (Taxol)         |                            | NR            |
| 25       | IIA            | 3         | ER (+), PR (+), HER2 (+) | Doxorubicin (Adriamycin)   | Docetaxel (Taxotere)       | Cyclophosphamide (Cytoxan) | Trastuzumab (Herceptin)    | pCR           |
| 26       | IIB            | 3         | Triple Negative          | Doxorubicin (Adriamycin)   | Cyclophosphamide (Cytoxan) | Docetaxel (Taxotere)       |                            | NR            |
| 27       | IIA            | 2.4       | HER2 (+)*                | Trastuzumab (Herceptin)    | Lapatinib                  |                            |                            | NR            |
| 28       | IIA            | 5         | HER2 (+)*                | Trastuzumab (Herceptin)    | Lapatinib                  |                            |                            | pCR           |
| 29       | IIA            | 3         | HER2 (+)*                | Doxorubicin (Adriamycin)   | Paclitaxel (Taxol)         | Trastuzumab (Herceptin)    | Cyclophosphamide (Cytoxan) | NR            |
| 30       | IIA            | 4.5       | ER (+), HER2+            | Trastuzumab (Herceptin)    | Lapatinib                  |                            |                            | NR            |
| 31       | IIB            | 2.8       | ER (+), HER2+            | Trastuzumab (Herceptin)    | Letrozole (Femara)         | Lapatinib                  | Other                      | NR            |
| 32       | IIB            | 6.6       | ER (+)                   | Doxorubicin (Adriamycin)   | Cyclophosphamide (Cytoxan) | Paclitaxel (Taxol)         |                            | NR            |
| 33       | I              | 2.5       | ER (+), HER2+            | Trastuzumab (Herceptin)    | Lapatinib                  |                            |                            | NR            |
| 34       | IIA            | 1         | Triple Negative          | Cisplatin (Platinol)       | Paclitaxel (Taxol)         |                            |                            | pCR           |
| 35       | IIIA           | 4         | HER2 (+)*                | Trastuzumab (Herceptin)    | Lapatinib                  | Docetaxel (Taxotere)       | Carboplatin (Paraplatin)   | NR            |
| 36       | IIA            | 4.5       | HER2 (+)*                | Lapatinib                  | Trastuzumab (Herceptin)    | Other                      | Paclitaxel (Taxol)         | NR            |
| 37       | IIB            | 3.5       | HER2 (+)*                | Lapatinib                  | Trastuzumab (Herceptin)    | Docetaxel (Taxotere)       | Other                      | pCR           |
| 38       | IIA            | 5         | Triple Negative          | Cyclophosphamide (Cytoxan) | Doxorubicin (Adriamycin)   | Paclitaxel (Taxol)         |                            | NR            |
| 39       | I              | 1.6       | ER (+), PR (+), HER2 (+) | Carboplatin (Paraplatin)   | Docetaxel (Taxotere)       | Trastuzumab (Herceptin)    | Other                      | pCR           |
| 40       | IIB            | 4.1       | ER (+), PR (+)           | Cyclophosphamide (Cytoxan) | Doxorubicin (Adriamycin)   | Paclitaxel (Taxol)         |                            | NR            |
| 41       | I              | 1.3       | ER (+)                   | Cyclophosphamide (Cytoxan) | Doxorubicin (Adriamycin)   | Paclitaxel (Taxol)         |                            | pCR           |
| 42       | IIIA           | 12        | HER2 (+)*                | Paclitaxel (Taxol)         | Trastuzumab (Herceptin)    | Other                      | Cyclophosphamide (Cytoxan) | NR            |
| 43       | IIA            | 2.8       | Triple Negative          | Cisplatin (Platinol)       | Paclitaxel (Taxol)         | Cyclophosphamide (Cytoxan) | Doxorubicin (Adriamycin)   | NR            |
| 44       | IIIA           | 9         | HER2 (+)*                | Trastuzumab (Herceptin)    | Other                      | Carboplatin (Paraplatin)   | Docetaxel (Taxotere)       | pCR           |
| 45       | IIB            | 5.5       | Triple Negative          | Paclitaxel (Taxol)         | Cyclophosphamide (Cytoxan) | Doxorubicin (Adriamycin)   |                            | pCR           |
| 46       | IIB            | 13        | Triple Negative          | Cyclophosphamide (Cytoxan) | Doxorubicin (Adriamycin)   | Carboplatin (Paraplatin)   | Paclitaxel (Taxol)         | pCR           |

**Supplemental Table 1: Individual patient and tumor characteristics at baseline, as well as chemotherapy regimens received and pathological response.**

| Study ID | Clinical stage | Size (cm) | Receptor Status | NAC Agent #1            | NAC Agent #2 | NAC Agent #3         | NAC Agent #4             | PATH RESPONSE |
|----------|----------------|-----------|-----------------|-------------------------|--------------|----------------------|--------------------------|---------------|
| 47       | I              | 2         | HER2 (+)*       | Trastuzumab (Herceptin) | Other        | Docetaxel (Taxotere) | Carboplatin (Paraplatin) | pCR           |

**Supplemental Table 2: Individual PET metrics for each patient and time point.**

| Study ID | Time point<br>(1=Baseline,<br>2=Post<br>Cycle 1,<br>3=Post<br>Cycle 2,<br>4=End of<br>Therapy) | Scan<br>position<br>performed<br>first | Time<br>between<br>scan<br>positions<br>(min) | Prone        |             |              |             | Supine       |             |              |             |
|----------|------------------------------------------------------------------------------------------------|----------------------------------------|-----------------------------------------------|--------------|-------------|--------------|-------------|--------------|-------------|--------------|-------------|
|          |                                                                                                |                                        |                                               | $SUV_{peak}$ | $SUV_{max}$ | $SUL_{peak}$ | $SUL_{max}$ | $SUV_{peak}$ | $SUV_{max}$ | $SUL_{peak}$ | $SUL_{max}$ |
| 1        | 1                                                                                              | Supine                                 | 30.92                                         | 16.25        | 20.65       | 10.98        | 13.95       | 13.95        | 16.22       | 9.43         | 10.96       |
| 1        | 4                                                                                              | Supine                                 | 24.88                                         | 1.12         | 2.06        | 0.78         | 1.43        | 1.51         | 2.30        | 1.05         | 1.60        |
| 2        | 1                                                                                              | Supine                                 | 23.77                                         | 14.06        | 18.24       | 9.81         | 12.72       | 14.15        | 16.90       | 9.87         | 11.79       |
| 2        | 4                                                                                              | Supine                                 | 20.28                                         | 1.64         | 1.93        | 1.15         | 1.36        | 1.98         | 2.26        | 1.39         | 1.59        |
| 3        | 1                                                                                              | Prone                                  | 12.77                                         | 13.15        | 14.66       | 8.35         | 9.31        | 15.14        | 16.35       | 9.62         | 10.38       |
| 3        | 4                                                                                              | Prone                                  | 9.38                                          | 5.13         | 6.15        | 3.17         | 3.81        | 6.26         | 7.33        | 3.88         | 4.54        |
| 4        | 1                                                                                              | Prone                                  | 11.73                                         | 3.25         | 4.05        | 1.89         | 2.36        | 3.50         | 4.13        | 2.04         | 2.41        |
| 4        | 4                                                                                              | Prone                                  | 10.17                                         | 1.78         | 2.26        | 0.97         | 1.24        | 2.57         | 3.00        | 1.41         | 1.64        |
| 5        | 1                                                                                              | Prone                                  | 11.48                                         | 2.24         | 2.71        | 1.19         | 1.44        | 2.38         | 2.87        | 1.27         | 1.53        |
| 6        | 1                                                                                              | Prone                                  | 21.18                                         | 17.01        | 20.19       | 10.55        | 12.53       | 22.10        | 26.07       | 13.71        | 16.17       |
| 7        | 1                                                                                              | Prone                                  | 10.22                                         | 11.27        | 14.24       | 8.02         | 10.13       | 12.08        | 15.41       | 8.60         | 10.96       |
| 7        | 4                                                                                              | Prone                                  | 10.37                                         | 1.22         | 1.34        | 0.83         | 0.91        | 1.28         | 1.55        | 0.87         | 1.05        |
| 8        | 1                                                                                              | Prone                                  | 12.02                                         | 9.33         | 12.00       | 5.56         | 7.15        | 9.86         | 12.18       | 5.88         | 7.26        |
| 9        | 1                                                                                              | Prone                                  | 11.52                                         | 6.92         | 8.35        | 4.79         | 5.78        | 7.87         | 9.68        | 5.45         | 6.70        |
| 9        | 4                                                                                              | Prone                                  | 10.52                                         | 4.51         | 5.78        | 3.09         | 3.97        | 5.36         | 6.69        | 3.67         | 4.59        |
| 10       | 1                                                                                              | Prone                                  | 9.73                                          | 5.81         | 8.68        | 3.45         | 5.16        | 6.21         | 8.71        | 3.68         | 5.17        |
| 10       | 4                                                                                              | Prone                                  | 11.95                                         | 3.47         | 5.20        | 2.30         | 3.44        | 4.43         | 6.71        | 2.93         | 4.44        |
| 11       | 1                                                                                              | Prone                                  | 10.45                                         | 20.48        | 21.66       | 13.91        | 14.71       | 22.73        | 24.71       | 15.44        | 16.78       |
| 12       | 1                                                                                              | Prone                                  | 11.05                                         | 8.87         | 10.89       | 5.94         | 7.30        | 8.99         | 11.41       | 6.03         | 7.65        |
| 12       | 4                                                                                              | Prone                                  | 9.65                                          | 0.59         | 0.70        | 0.39         | 0.47        | 0.86         | 1.28        | 0.58         | 0.85        |
| 13       | 1                                                                                              | Prone                                  | 10.48                                         | 6.40         | 8.34        | 5.12         | 6.67        | 7.71         | 10.07       | 6.16         | 8.06        |
| 13       | 4                                                                                              | Prone                                  | 11.97                                         | 0.73         | 0.80        | 0.57         | 0.62        | 0.72         | 0.86        | 0.56         | 0.67        |
| 14       | 1                                                                                              | Prone                                  | 13.17                                         | 5.09         | 6.34        | 3.68         | 4.59        | 6.33         | 8.39        | 4.58         | 6.08        |
| 15       | 1                                                                                              | Prone                                  | 11.48                                         | 10.61        | 13.17       | 7.26         | 9.01        | 14.77        | 17.10       | 10.11        | 11.70       |
| 16       | 1                                                                                              | Prone                                  | 10.50                                         | 5.55         | 8.11        | 3.56         | 5.21        | 7.45         | 11.16       | 4.78         | 7.17        |
| 16       | 4                                                                                              | Prone                                  | 12.22                                         | 1.85         | 2.05        | 1.15         | 1.28        | 1.89         | 2.18        | 1.18         | 1.36        |
| 17       | 1                                                                                              | Prone                                  | 9.85                                          | 2.19         | 2.72        | 1.64         | 2.04        | 2.64         | 3.27        | 1.99         | 2.45        |
| 17       | 4                                                                                              | Prone                                  | 10.02                                         | 1.57         | 1.92        | 1.15         | 1.40        | 1.41         | 1.73        | 1.03         | 1.27        |
| 18       | 1                                                                                              | Prone                                  | 11.40                                         | 9.53         | 12.47       | 6.20         | 8.11        | 13.09        | 15.21       | 8.51         | 9.90        |
| 19       | 1                                                                                              | Prone                                  | 11.47                                         | 6.35         | 6.99        | 4.48         | 4.93        | 7.78         | 9.17        | 5.49         | 6.47        |
| 19       | 4                                                                                              | Prone                                  | 11.28                                         | 1.12         | 1.41        | 0.78         | 0.98        | 1.34         | 1.87        | 0.94         | 1.31        |
| 20       | 1                                                                                              | Prone                                  | 10.95                                         | 5.84         | 7.67        | 4.31         | 5.67        | 7.08         | 9.88        | 5.22         | 7.30        |
| 20       | 4                                                                                              | Prone                                  | 9.77                                          | 1.16         | 1.55        | 0.83         | 1.12        | 1.18         | 1.33        | 0.85         | 0.96        |
| 21       | 1                                                                                              | Prone                                  | 9.68                                          | 1.60         | 1.90        | 0.98         | 1.17        | 1.73         | 2.09        | 1.06         | 1.28        |
| 21       | 4                                                                                              | Prone                                  | 12.30                                         | 1.41         | 1.69        | 0.89         | 1.06        | 1.54         | 1.92        | 0.97         | 1.21        |

**Supplemental Table 2: Individual PET metrics for each patient and time point.**

| Study ID | Time point<br>(1=Baseline,<br>2=Post<br>Cycle 1,<br>3=Post<br>Cycle 2,<br>4=End of<br>Therapy) | Scan<br>position<br>performed<br>first | Time<br>between<br>scan<br>positions<br>(min) | Prone        |             |              |             | Supine       |             |              |             |
|----------|------------------------------------------------------------------------------------------------|----------------------------------------|-----------------------------------------------|--------------|-------------|--------------|-------------|--------------|-------------|--------------|-------------|
|          |                                                                                                |                                        |                                               | $SUV_{peak}$ | $SUV_{max}$ | $SUL_{peak}$ | $SUL_{max}$ | $SUV_{peak}$ | $SUV_{max}$ | $SUL_{peak}$ | $SUL_{max}$ |
| 22       | 1                                                                                              | Prone                                  | 10.20                                         | 7.61         | 9.47        | 5.27         | 6.56        | 9.21         | 11.96       | 6.38         | 8.28        |
| 22       | 4                                                                                              | Prone                                  | 11.20                                         | 6.45         | 7.59        | 4.43         | 5.21        | 7.35         | 9.30        | 5.05         | 6.38        |
| 23       | 1                                                                                              | Prone                                  | 13.95                                         | 4.78         | 5.14        | 3.10         | 3.33        | 5.97         | 6.56        | 3.86         | 4.24        |
| 24       | 1                                                                                              | Prone                                  | 14.15                                         | 9.69         | 10.90       | 6.31         | 7.10        | 10.53        | 13.29       | 6.86         | 8.66        |
| 24       | 4                                                                                              | Prone                                  | 11.92                                         | 1.53         | 2.04        | 0.98         | 1.31        | 1.74         | 2.20        | 1.11         | 1.41        |
| 25L*     | 1                                                                                              | Prone                                  | 10.65                                         | 17.88        | 20.21       | 9.97         | 11.27       | 21.65        | 25.57       | 12.07        | 14.25       |
| 25R*     | 1                                                                                              | Prone                                  | 10.65                                         | 7.60         | 8.51        | 4.24         | 4.74        | 9.63         | 11.09       | 5.37         | 6.18        |
| 26       | 1                                                                                              | Prone                                  | 11.90                                         | 5.04         | 6.34        | 3.59         | 4.51        | 5.52         | 6.12        | 3.92         | 4.35        |
| 26       | 4                                                                                              | Prone                                  | 10.77                                         | 1.50         | 1.68        | 1.09         | 1.22        | 1.54         | 1.86        | 1.12         | 1.35        |
| 27       | 1                                                                                              | Prone                                  | 9.18                                          | 8.68         | 10.19       | 5.76         | 6.77        | 9.37         | 11.82       | 6.22         | 7.85        |
| 27       | 4                                                                                              | Prone                                  | 10.88                                         | 9.14         | 10.35       | 5.89         | 6.67        | 11.21        | 12.96       | 7.22         | 8.35        |
| 28       | 1                                                                                              | Prone                                  | 9.72                                          | 9.20         | 10.41       | 5.89         | 6.66        | 11.66        | 13.98       | 7.46         | 8.95        |
| 28       | 4                                                                                              | Prone                                  | 10.58                                         | 1.22         | 1.79        | 0.75         | 1.11        | 1.38         | 1.81        | 0.85         | 1.12        |
| 29       | 1                                                                                              | Prone                                  | 10.25                                         | 15.84        | 18.30       | 9.62         | 11.12       | 20.52        | 22.29       | 12.47        | 13.54       |
| 29       | 3                                                                                              | Prone                                  | 10.03                                         | 11.13        | 14.01       | 6.29         | 7.91        | 13.76        | 17.09       | 7.77         | 9.66        |
| 30       | 1                                                                                              | Prone                                  | 10.92                                         | 2.76         | 3.69        | 1.98         | 2.65        | 3.54         | 5.02        | 2.55         | 3.61        |
| 31       | 1                                                                                              | Prone                                  | 9.73                                          | 14.27        | 17.57       | 9.28         | 11.42       | 18.24        | 22.81       | 11.86        | 14.83       |
| 31       | 3                                                                                              | Prone                                  | 10.57                                         | 1.27         | 1.43        | 0.82         | 0.93        | 1.27         | 1.44        | 0.83         | 0.94        |
| 32       | 1                                                                                              | Prone                                  | 9.82                                          | 6.89         | 9.28        | 4.30         | 5.79        | 8.94         | 11.04       | 5.58         | 6.89        |
| 32       | 3                                                                                              | Prone                                  | 9.43                                          | 5.51         | 7.50        | 3.38         | 4.60        | 6.91         | 8.86        | 4.24         | 5.44        |
| 33       | 1                                                                                              | Prone                                  | 12.65                                         | 4.78         | 7.60        | 2.66         | 4.23        | 7.38         | 10.30       | 4.11         | 5.73        |
| 33       | 3                                                                                              | Prone                                  | 9.30                                          | 7.02         | 9.88        | 3.81         | 5.36        | 8.79         | 12.63       | 4.77         | 6.85        |
| 34       | 1                                                                                              | Prone                                  | 10.97                                         | 6.97         | 10.22       | 5.00         | 7.33        | 8.40         | 12.79       | 6.02         | 9.17        |
| 35       | 1                                                                                              | Prone                                  | 9.97                                          | 9.61         | 12.48       | 5.55         | 7.21        | 10.96        | 13.14       | 6.33         | 7.59        |
| 35       | 3                                                                                              | Prone                                  | 11.12                                         | 4.23         | 4.80        | 2.45         | 2.78        | 5.28         | 6.19        | 3.05         | 3.58        |
| 36       | 1                                                                                              | Prone                                  | 13.65                                         | 4.44         | 6.42        | 2.24         | 3.25        | 5.45         | 7.96        | 2.75         | 4.03        |
| 37       | 3                                                                                              | Prone                                  | 10.13                                         | 1.41         | 1.76        | 1.09         | 1.35        | 1.44         | 1.93        | 1.11         | 1.49        |
| 38       | 1                                                                                              | Prone                                  | 14.98                                         | 10.22        | 11.53       | 4.59         | 5.18        | 13.53        | 16.35       | 6.07         | 7.34        |
| 39       | 1                                                                                              | Prone                                  | 10.50                                         | 4.80         | 7.28        | 2.84         | 4.30        | 6.51         | 8.91        | 3.84         | 5.26        |
| 39       | 3                                                                                              | Prone                                  | 10.48                                         | 0.83         | 0.99        | 0.51         | 0.61        | 0.93         | 1.21        | 0.57         | 0.74        |
| 40       | 1                                                                                              | Prone                                  | 13.03                                         | 3.80         | 4.20        | 2.32         | 2.56        | 4.43         | 4.99        | 2.70         | 3.05        |
| 41       | 1                                                                                              | Prone                                  | 12.93                                         | 1.11         | 1.80        | 0.83         | 1.34        | 0.92         | 1.28        | 0.68         | 0.95        |
| 41       | 3                                                                                              | Prone                                  | 11.07                                         | 0.72         | 0.98        | 0.53         | 0.72        | 0.78         | 1.06        | 0.58         | 0.78        |
| 42       | 1                                                                                              | Prone                                  | 10.68                                         | 10.25        | 11.47       | 6.09         | 6.81        | 13.32        | 14.52       | 7.91         | 8.62        |
| 43       | 1                                                                                              | Prone                                  | 13.75                                         | 9.65         | 13.73       | 5.65         | 8.04        | 10.49        | 16.60       | 6.14         | 9.72        |

**Supplemental Table 2: Individual PET metrics for each patient and time point.**

| Study ID | Time point<br>(1=Baseline,<br>2=Post<br>Cycle 1,<br>3=Post<br>Cycle 2,<br>4=End of<br>Therapy) | Scan<br>position<br>performed<br>first | Time<br>between<br>scan<br>positions<br>(min) | Prone                     |                          |                           |                          | Supine                    |                          |                           |                          |
|----------|------------------------------------------------------------------------------------------------|----------------------------------------|-----------------------------------------------|---------------------------|--------------------------|---------------------------|--------------------------|---------------------------|--------------------------|---------------------------|--------------------------|
|          |                                                                                                |                                        |                                               | <i>SUV<sub>peak</sub></i> | <i>SUV<sub>max</sub></i> | <i>SUL<sub>peak</sub></i> | <i>SUL<sub>max</sub></i> | <i>SUV<sub>peak</sub></i> | <i>SUV<sub>max</sub></i> | <i>SUL<sub>peak</sub></i> | <i>SUL<sub>max</sub></i> |
| 43       | 3                                                                                              | Prone                                  | 9.95                                          | 2.53                      | 3.19                     | 1.48                      | 1.87                     | 4.06                      | 5.51                     | 2.37                      | 3.22                     |
| 44       | 1                                                                                              | Prone                                  | 10.43                                         | 15.35                     | 16.23                    | 11.00                     | 11.63                    | 18.40                     | 20.38                    | 13.19                     | 14.61                    |
| 44       | 2                                                                                              | Prone                                  | 11.78                                         | 12.03                     | 13.19                    | 8.75                      | 9.60                     | 13.33                     | 14.45                    | 9.70                      | 10.51                    |
| 45       | 1                                                                                              | Prone                                  | 10.62                                         | 32.03                     | 41.56                    | 17.21                     | 22.33                    | 40.19                     | 53.92                    | 21.59                     | 28.97                    |
| 46       | 1                                                                                              | Prone                                  | 12.17                                         | 18.51                     | 20.47                    | 7.10                      | 7.86                     | 22.25                     | 24.48                    | 8.54                      | 9.40                     |
| 47       | 1                                                                                              | Prone                                  | 10.57                                         | 1.45                      | 2.12                     | 0.88                      | 1.29                     | 1.76                      | 2.74                     | 1.07                      | 1.67                     |
| 47       | 2                                                                                              | Prone                                  | 11.95                                         | 1.36                      | 1.96                     | 0.84                      | 1.22                     | 0.80                      | 1.09                     | 0.50                      | 0.68                     |
| 47       | 3                                                                                              | Prone                                  | 10.22                                         | 0.98                      | 1.15                     | 0.62                      | 0.73                     | 1.02                      | 1.28                     | 0.64                      | 0.81                     |

\*Patient had two breast lesions, one in each breast; PET values were calculated for both lesions.

Supplemental Figure 1: Scatter and Bland-Altman plots for  $SUV_{peak}$  and PERCIST  $SUV_{peak}$ .

**A**

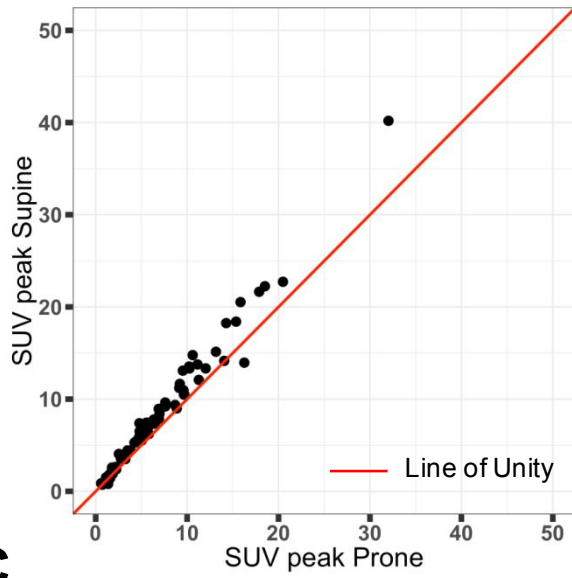

**B**

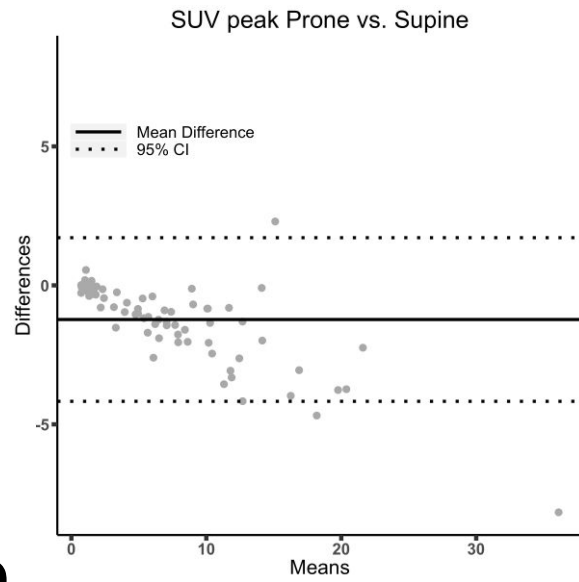

**C**

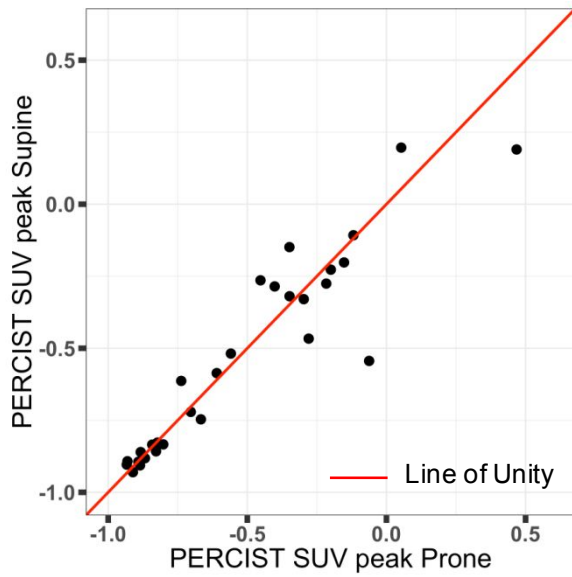

**D**

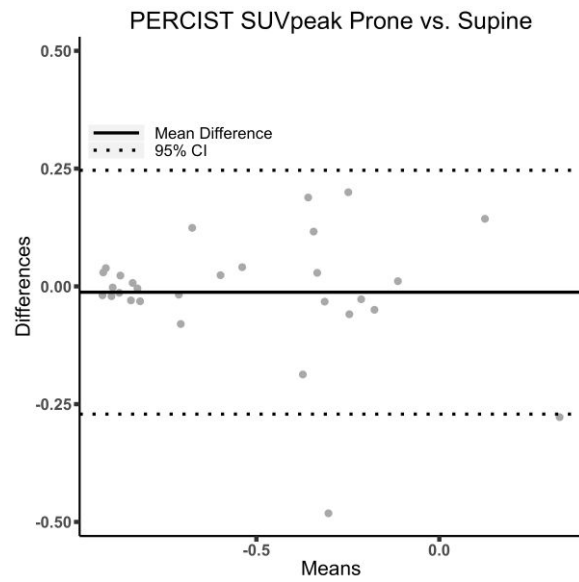



Supplemental Figure 2: Scatter and Bland-Altman plots for  $SUV_{max}$  and PERCIST  $SUV_{max}$ .

**A**

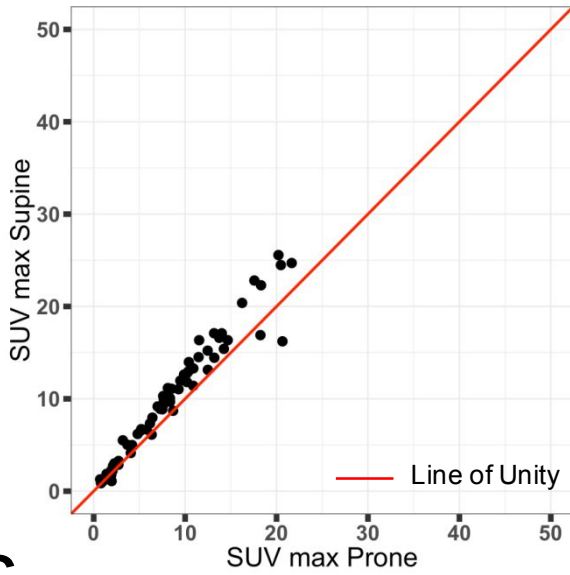

**B**

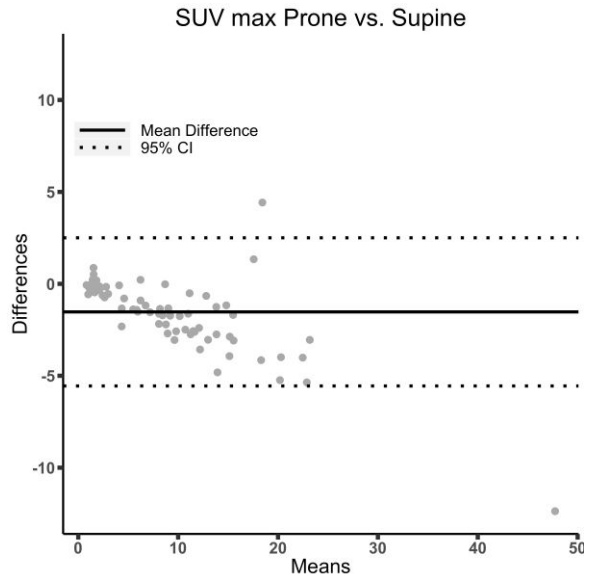

**C**

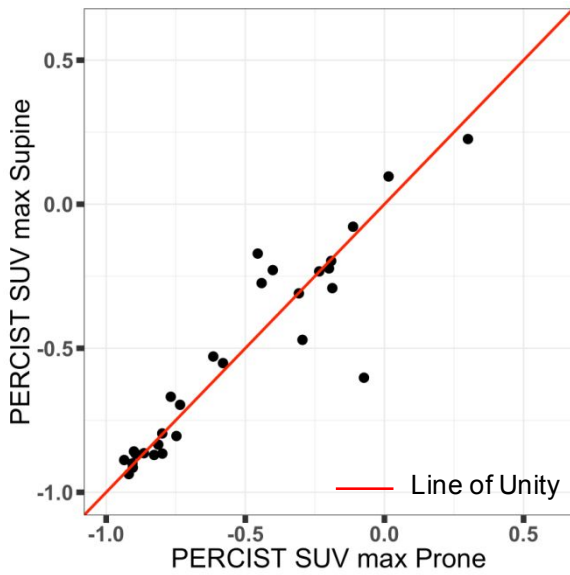

**D**

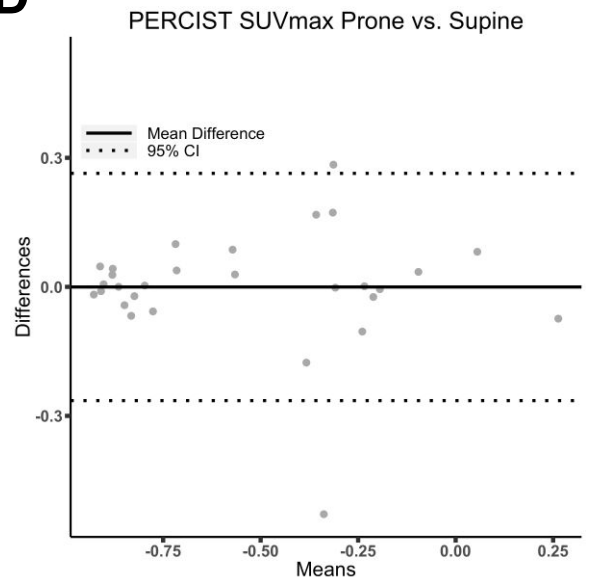

Supplemental Figure 3: Scatter and Bland-Altman plots for  $SUL_{max}$  and PERCIST  $SUL_{max}$ .

**A**

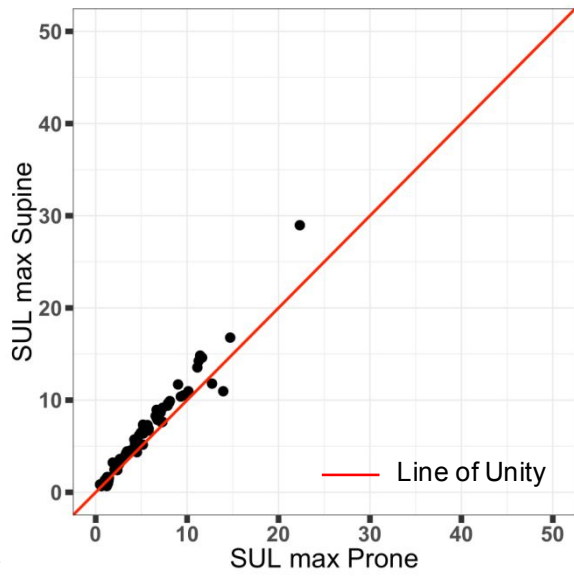

**B**

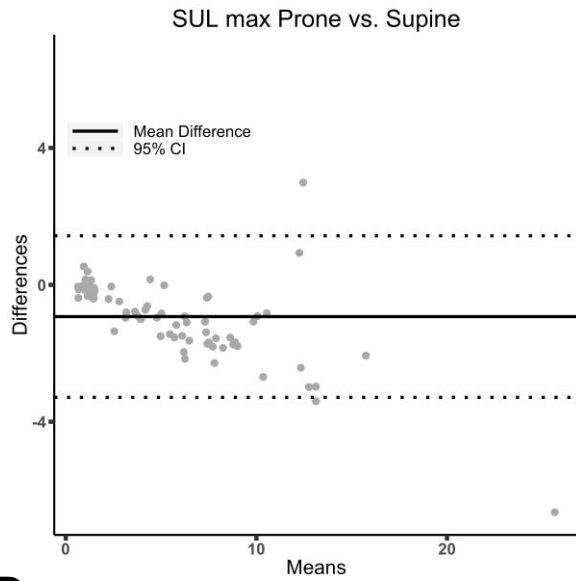

**C**

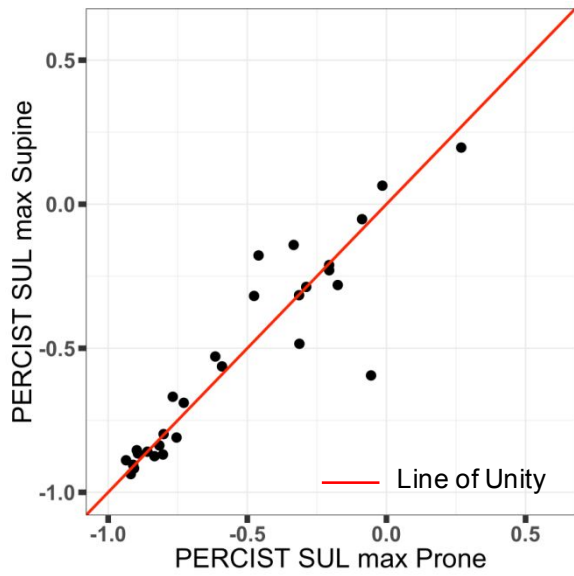

**D**

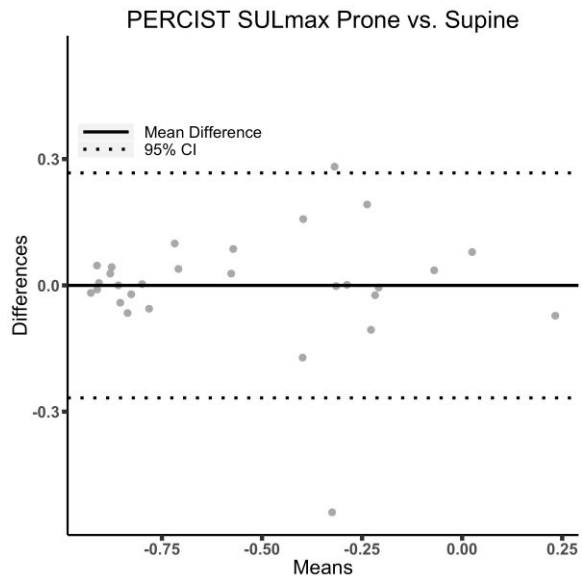

Supplement: tom.2020.00002.sup.01.pdf [file tom.2020.00002.sup.01.pdf]
